# Supplementary material for: Functional nanoparticle-decorated graphene oxide sheets as stabilizers for Pickering high internal phase emulsions and graphene oxide based foam monoliths
Source: Royal Society of Chemistry journal article supplement (doi:10.1039/c5ra18397a), 2015-01-01
Supplement: c5ra18397a1.pdf [file c5ra18397a1.pdf]

## Electronic Supplementary Information (ESI)

### Functional nanoparticle-decorated graphene oxide sheets as stabilizers for Pickering high internal phase emulsions and graphene oxide based foam monoliths

Yang Hu,<sup>a,b</sup> Jian Huang,<sup>a</sup> Qi Zhang,<sup>a</sup> Yu Yang,<sup>a</sup> Shanshan Ma<sup>a</sup> and

Chaoyang Wang<sup>\*,a</sup>

<sup>a</sup>Research Institute of Materials Science, South China University of Technology, Guangzhou 510640, China. E-mail: zhywang@scut.edu.cn

<sup>b</sup>Institute of Biomaterials, College of Materials and Energy, South China Agriculture University, Guangzhou 510642, China.

#### Fabrication of TiO<sub>2</sub> and Mn<sub>3</sub>O<sub>4</sub> nanoparticle-decorated GO sheets

TiO<sub>2</sub> nanoparticle-decorated GO sheets: 2 mL of the as-prepared GO aqueous suspension was adjusted to pH 5.0 by adding EDA. Next, 17  $\mu$ L of aqueous titanium trichloride (TiCl<sub>3</sub>) containing 30 mg of TiCl<sub>3</sub> was mixed into the GO aqueous suspension. Furthermore, the mixture was reacted for 5 min at room temperature to obtain TiO<sub>2</sub> nanoparticle-decorated GO suspension.

Mn<sub>3</sub>O<sub>4</sub> nanoparticle-decorated GO sheets: 2 mL of the as-prepared GO aqueous suspension was adjusted to pH 7.0 by adding EDA. Next, 30 mg of MnCl<sub>2</sub> was added into the GO suspension, and the system was reacted for 5 min at room temperature to obtain Mn<sub>3</sub>O<sub>4</sub> nanoparticle-decorated GO suspension.

For further characterization, the prepared nanoparticle-decorated GO suspensions were centrifugally washed five times with water, followed by freeze-drying to obtain the dried nanoparticle-decorated GO.

**Table S1.** Parameters of toluene-in-water emulsions prepared under different conditions.

| Sample | GO (mg mL <sup>-1</sup> ) | pH modifier                       | FeCl <sub>2</sub> (mg mL <sup>-1</sup> )                | Can form HIPE? |
|--------|---------------------------|-----------------------------------|---------------------------------------------------------|----------------|
| 1      | 3                         | EDA                               | 37.5                                                    | Yes            |
| 2      | 3                         | EDA                               | 31.25                                                   | Yes            |
| 3      | 3                         | EDA                               | 25                                                      | Yes            |
| 4      | 3                         | EDA                               | 18.75                                                   | Yes            |
| 5      | 3                         | EDA                               | 12.5                                                    | Yes            |
| 6      | 3                         | EDA                               | 6.25                                                    | No             |
| 7      | 3                         | EDA                               | 0                                                       | No             |
| 8      | 0.75                      | EDA                               | 12.5                                                    | No             |
| 9      | 1.5                       | EDA                               | 12.5                                                    | No             |
| 10     | 6                         | EDA                               | 12.5                                                    | No             |
| 11     | 9                         | EDA                               | 12.5                                                    | No             |
| 12     | 3                         | EDA                               | 12.5 mg mL <sup>-1</sup> Fe <sub>3</sub> O <sub>4</sub> | No             |
| 13     | 3                         | DETA                              | 12.5                                                    | No             |
| 14     | 3                         | NaOH                              | 12.5                                                    | No             |
| 15     | 3                         | NH <sub>3</sub> ·H <sub>2</sub> O | 12.5                                                    | No             |

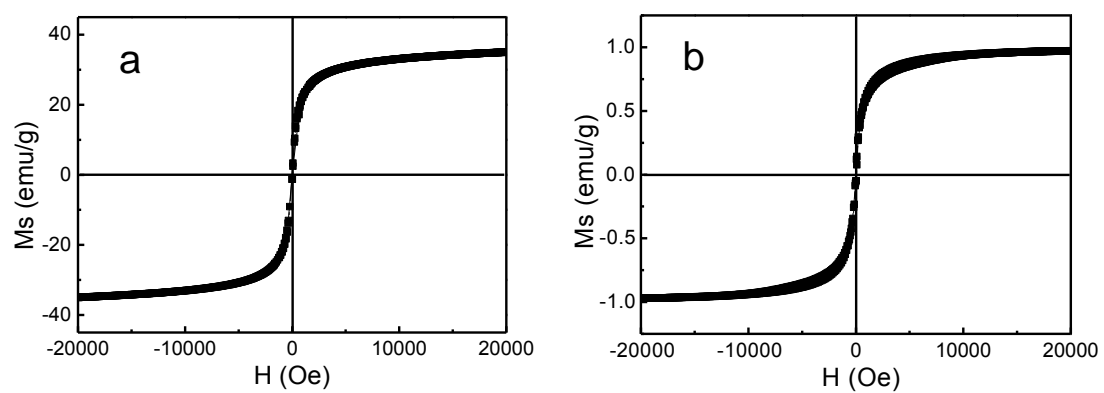

Fig. S1. Magnetization curves of (a) Fe<sub>3</sub>O<sub>4</sub> nanoparticle-decorated GO and (b) porous Fe<sub>3</sub>O<sub>4</sub> nanoparticle-decorated GO/PMF foams.

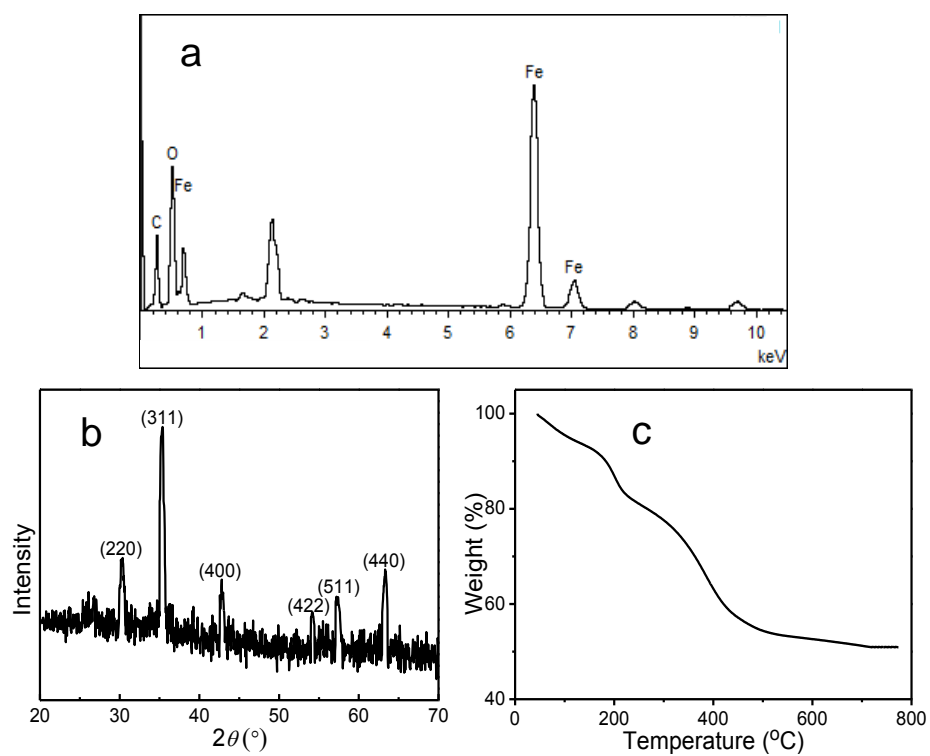

**Fig. S2.** (a) EDS spectrum, (b) XRD pattern and (c) TGA curve of  $\text{Fe}_3\text{O}_4$  nanoparticle-decorated GO.

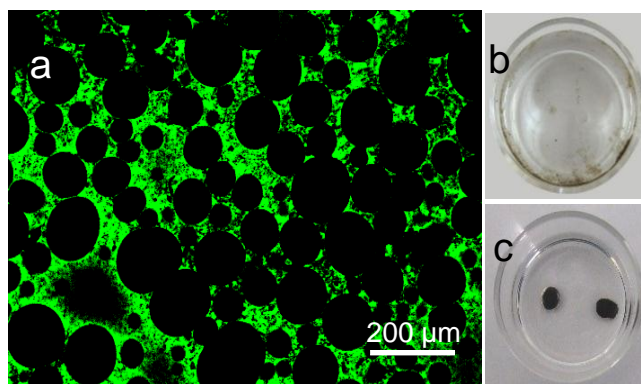

**Fig. S3.** (a) Fluorescence micrograph of toluene-in-water Pickering HIPE stabilized by  $\text{Fe}_3\text{O}_4$  nanoparticle-decorated GO sheets. Digital photographs of drop test of the Pickering HIPE dispersing in (b) water and (c) toluene. The internal phase fraction of Pickering HIPE is 80 vol%.

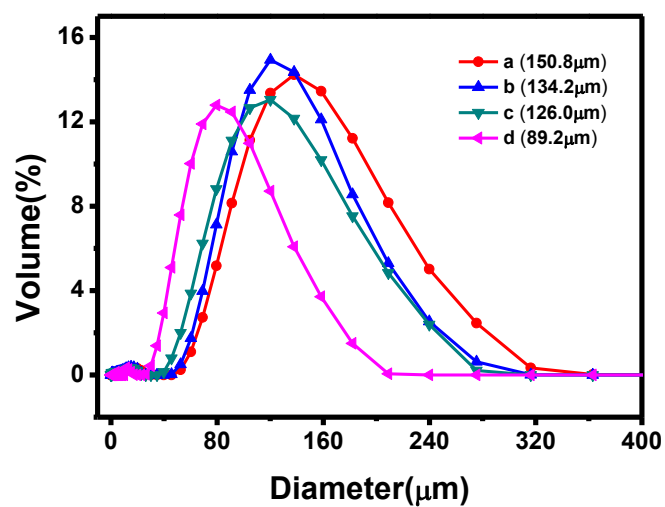

**Fig. S4.** The size distribution graphs of toluene-in-water Pickering HIPEs stabilized by  $\text{Fe}_3\text{O}_4$  nanoparticle-decorated GO sheets formed with different concentration of  $\text{FeCl}_2$ : (a) 18.75, (b) 25, (c) 31.25, and (d) 37.5  $\text{mg mL}^{-1}$ . The GO sheet concentration in aqueous suspension is 3  $\text{mg mL}^{-1}$ . The internal phase fraction of the emulsions is 75 vol%.

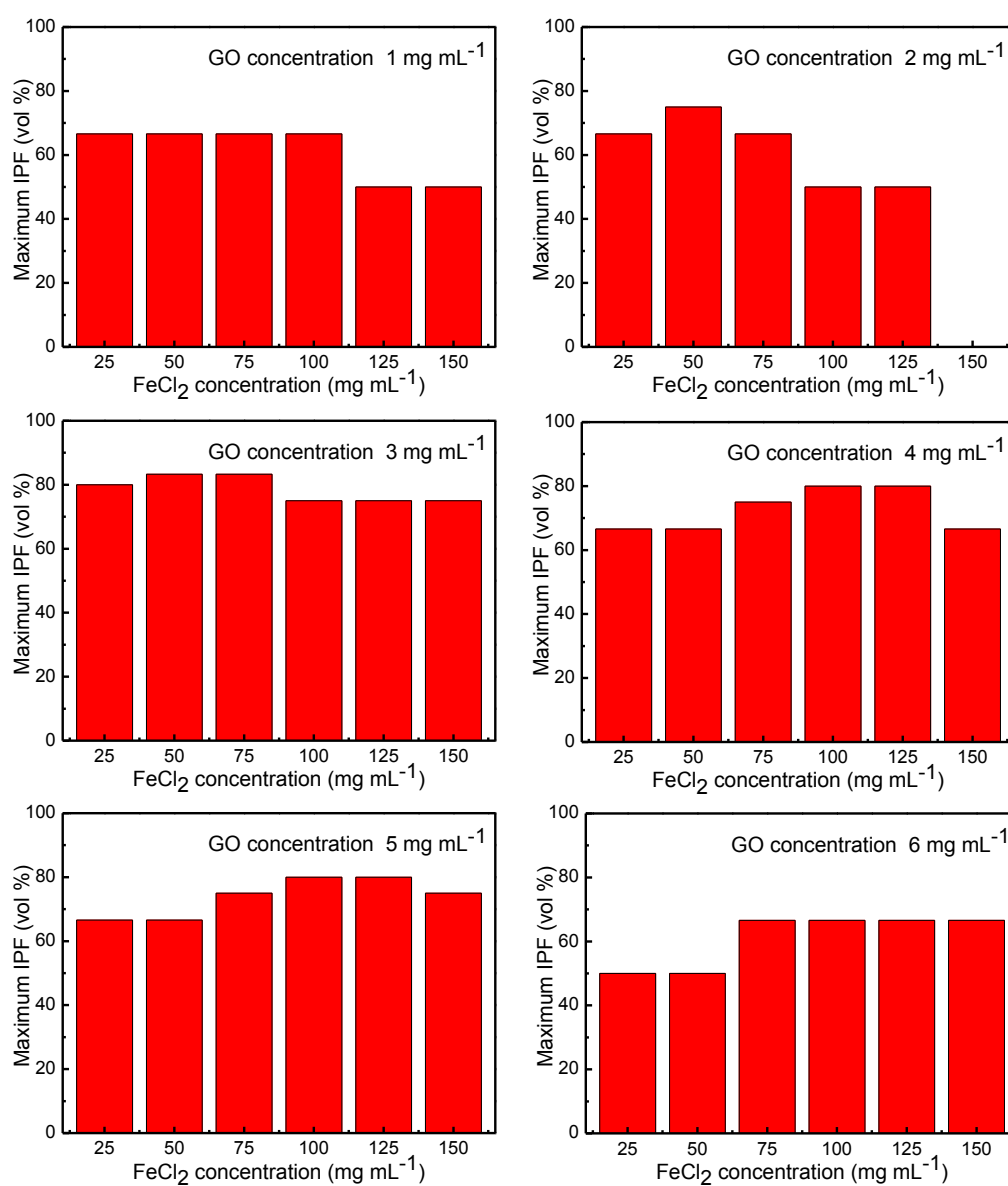

**Fig. S5.** The maximum internal phase fractions (IPFs) of toluene-in-water emulsions prepared with various GO concentrations and  $\text{FeCl}_2$  concentrations.

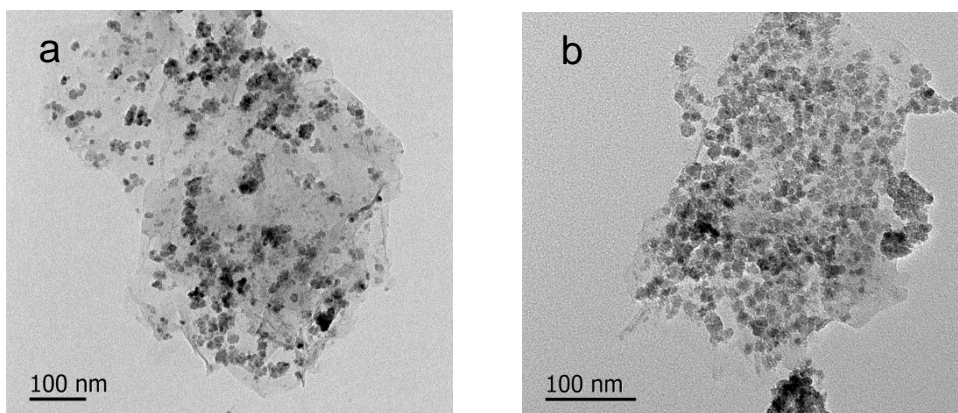

**Fig. S6.** TEM images of (a)  $\text{TiO}_2$  and (b)  $\text{Mn}_3\text{O}_4$  nanoparticle-decorated GO sheets.

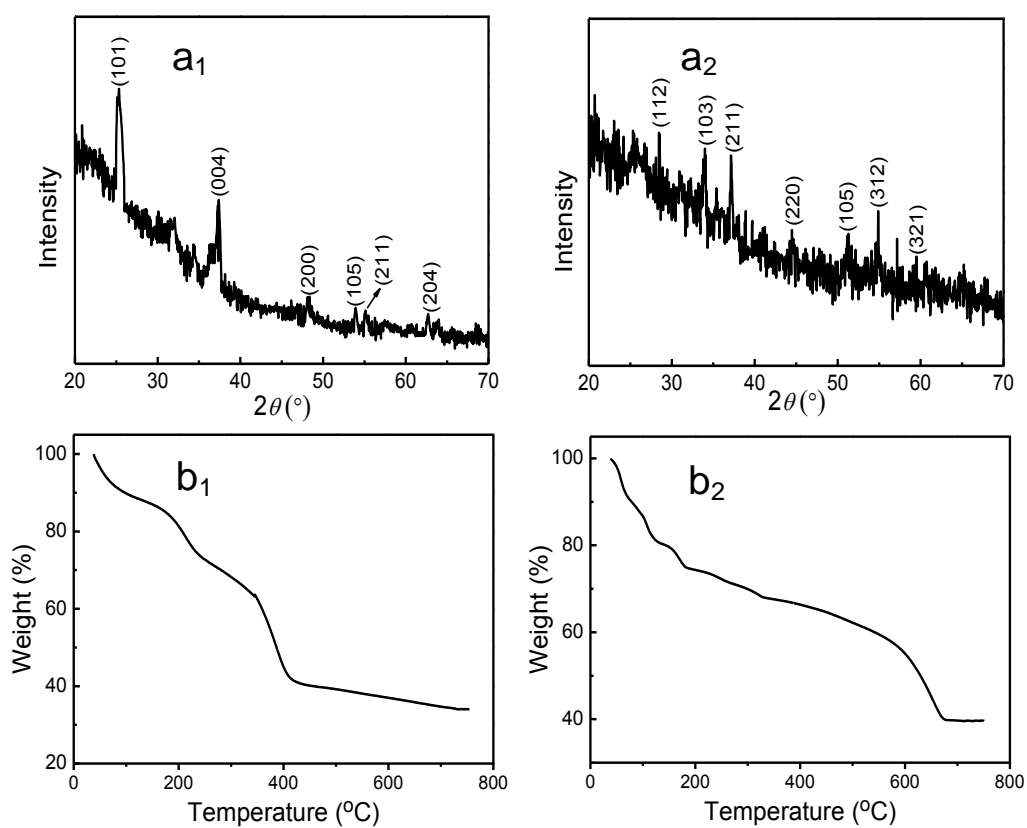

**Fig. S7.** XRD patterns of (a<sub>1</sub>) TiO<sub>2</sub> and (a<sub>2</sub>) Mn<sub>3</sub>O<sub>4</sub> nanoparticle-decorated GO sheets. TGA curves of (b<sub>1</sub>) TiO<sub>2</sub> and (b<sub>2</sub>) Mn<sub>3</sub>O<sub>4</sub> nanoparticle-decorated GO sheets.

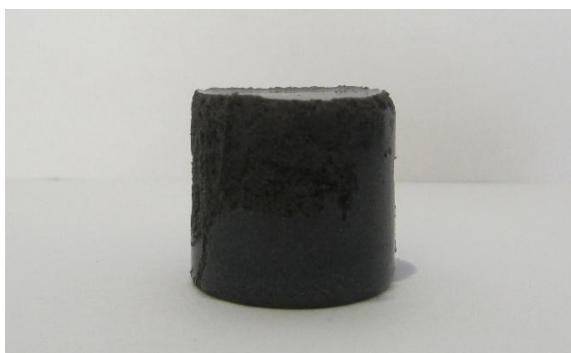

**Fig. S8.** Digital photograph of porous nanoparticle-decorated GO/PMF foam.

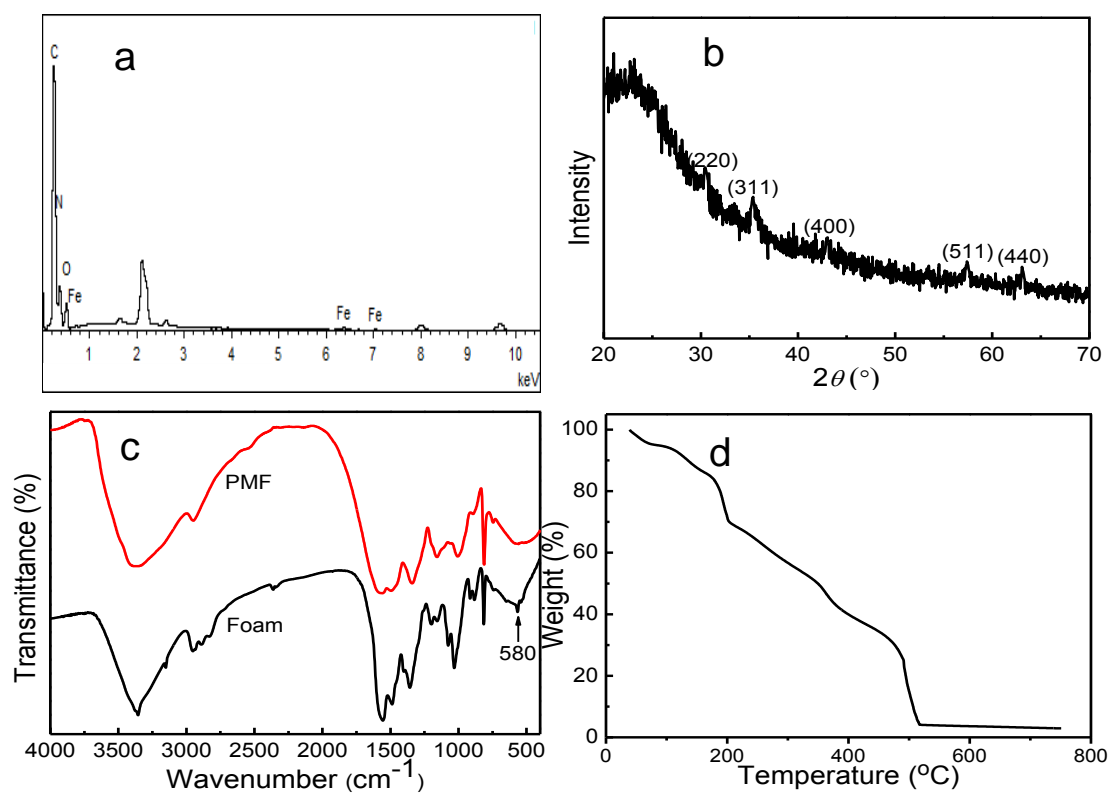

**Fig. S9.** (a) EDS spectrum and (b) XRD pattern of porous  $\text{Fe}_3\text{O}_4$  nanoparticle-decorated GO/PMF foam. (c) FTIR spectrum of pure PMF and porous  $\text{Fe}_3\text{O}_4$  nanoparticle-decorated GO/PMF foam. (d) TGA curve of porous  $\text{Fe}_3\text{O}_4$  nanoparticle-decorated GO/PMF foam.
